# Supplementary material for: Splicing Factor Transcript Abundance in Saliva as a Diagnostic Tool for Breast Cancer
Source: PubMed Central journal article supplement (PMC7463790; doi:10.3390/genes11080880), 2020-08-03
Supplement: genes-11-00880-s001.pdf [file genes-11-00880-s001.pdf]

**e**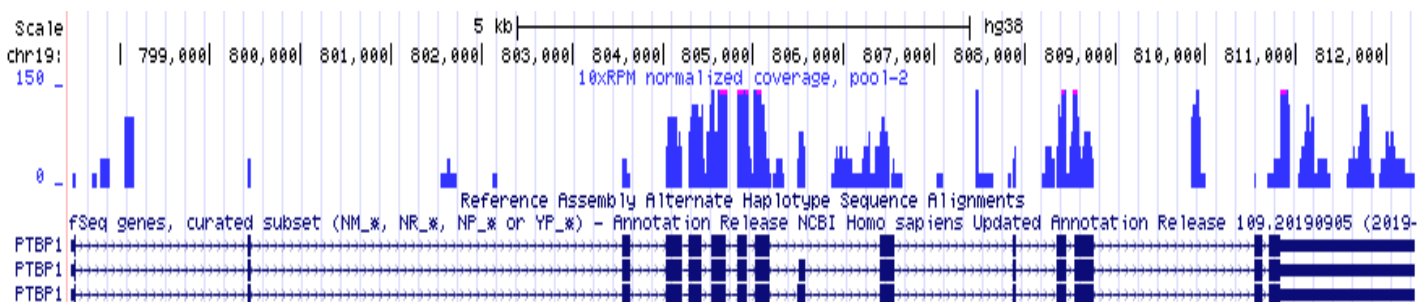**f**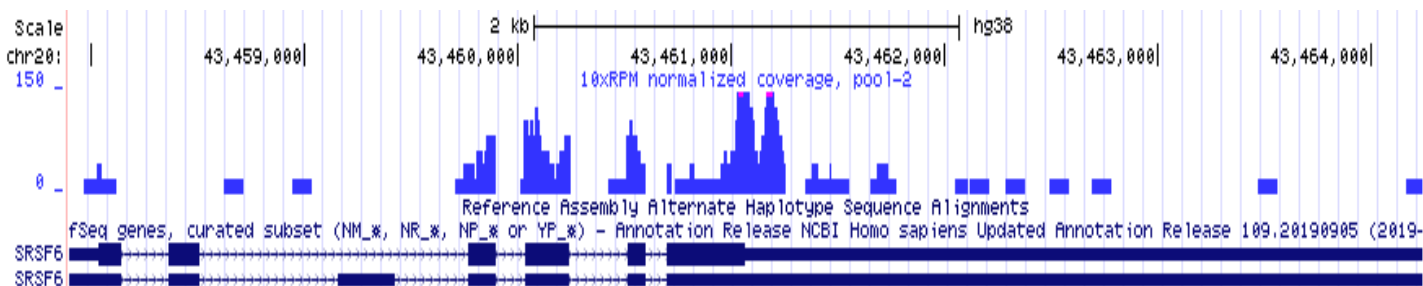**g**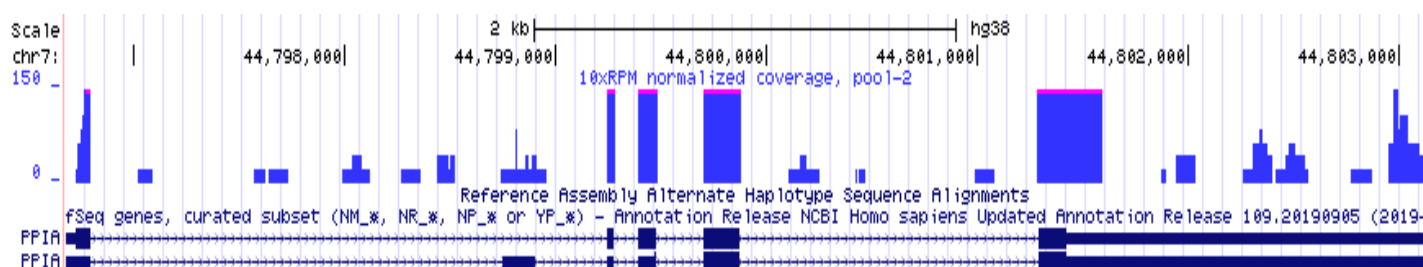

**Supplementary Figure S1: a.** To validate the presence of eight splicing factors in saliva, RNA was extracted from cell-free saliva from three different menstruating women with ages ranging from 20s to 50s and Real-time PCR was conducted. **b-g.** UCSC Genome Browser (reference genomeGRCh38/hg38). screen shot of RNA-seq data at the HNRNPA1 (**b**); HNRNPA2B1 (**c**); HNRNPA3 (**d**); PTBP1 (**e**); SRSF6 (**f**); and PPIA (**g**) locus genes.

# Supplementary Fig. S2

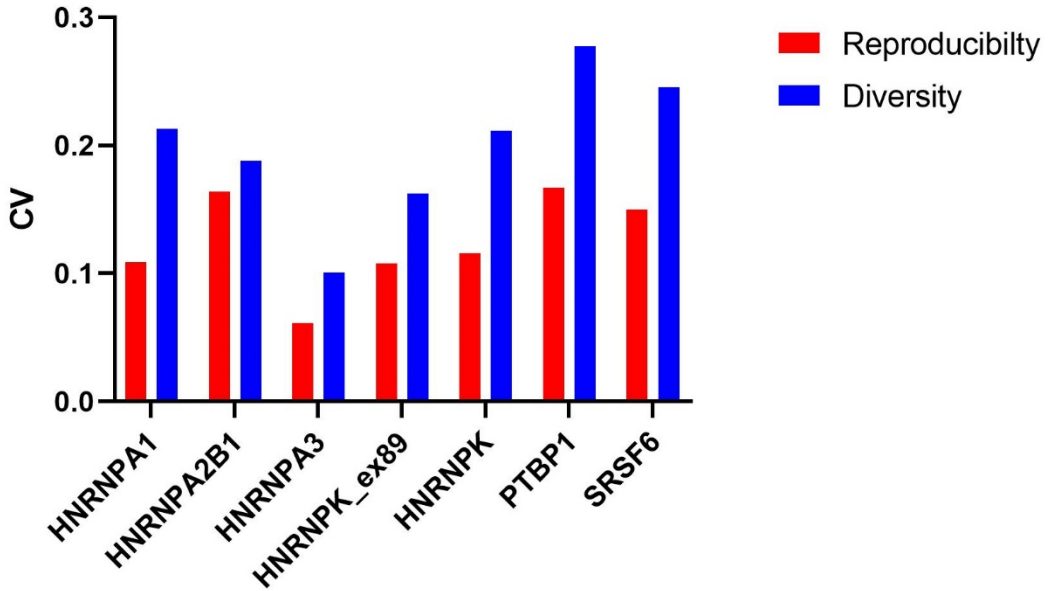

**Supplementary Figure S2:** For the reproducibility measurement, RNA was extracted from cell-free saliva from the same woman on different days. Diversity was measured by extraction of RNA from ten different menstruating women with ages ranging from 20s to 50s. Real-time PCR was conducted for HNRNPA1, HNRNPA2B1, HNRNPA3, HNRNPK, HNRNPK exon 8 inclusion, PTBP1 and SRSF6 and normalized to PPIA. Coefficient of variation (CV) statistical analysis was plotted.

# Supplementary Fig. S3

a

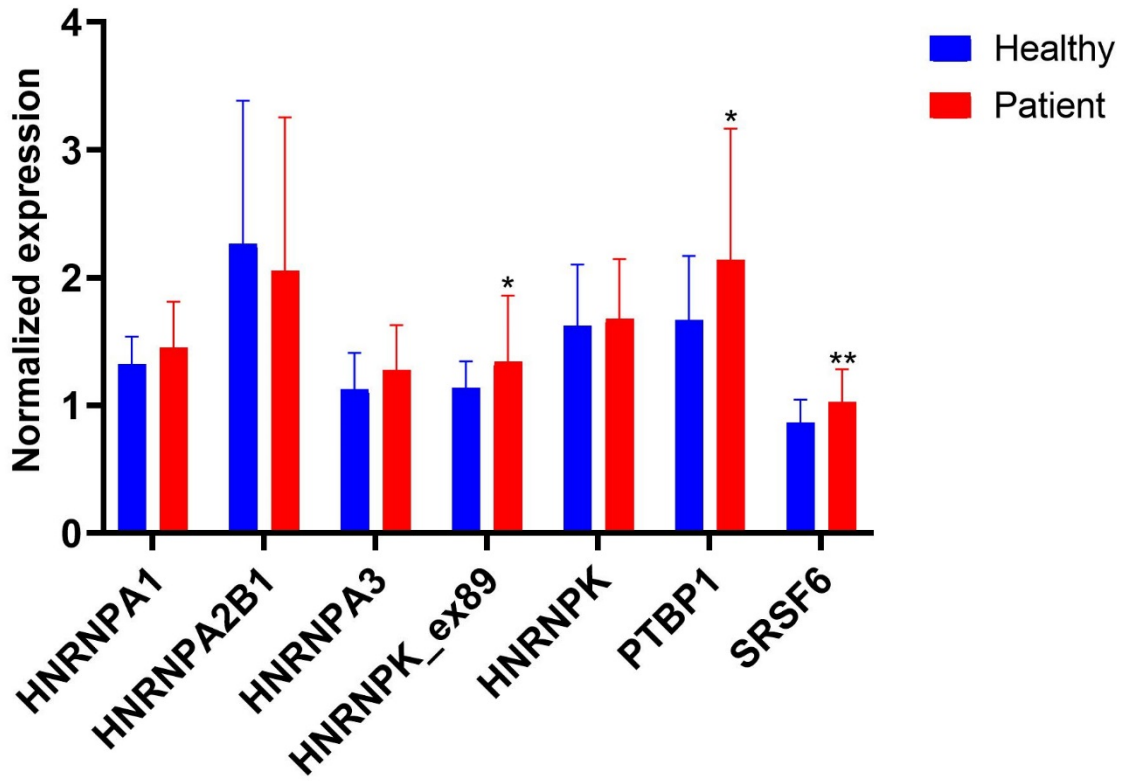

b

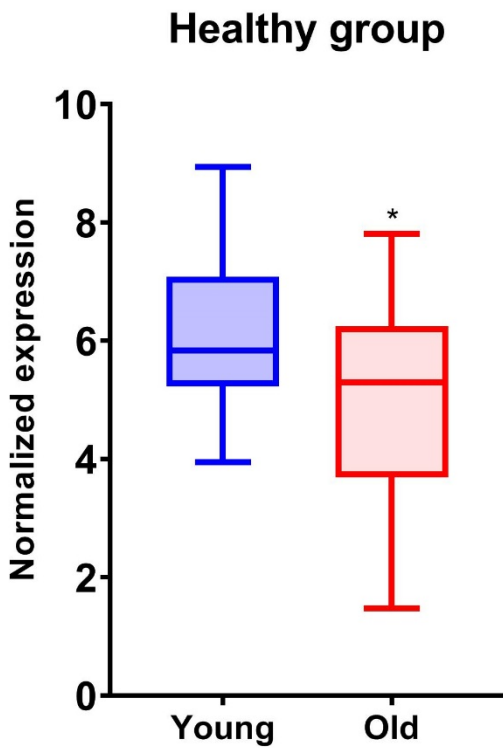

c

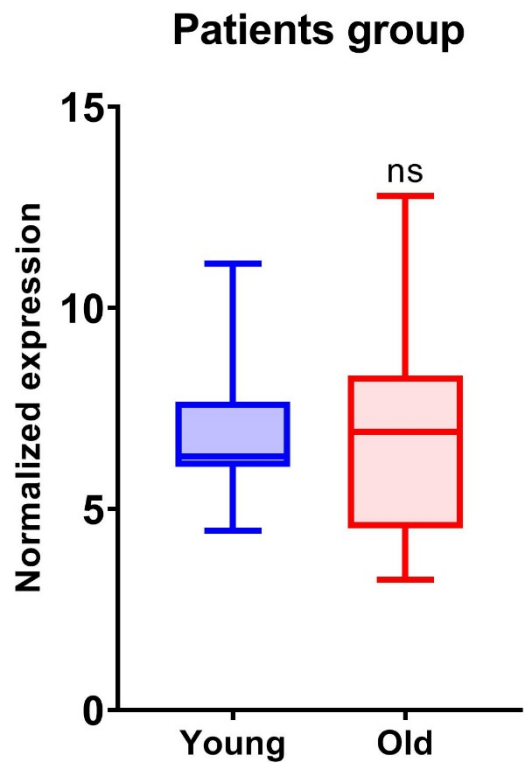

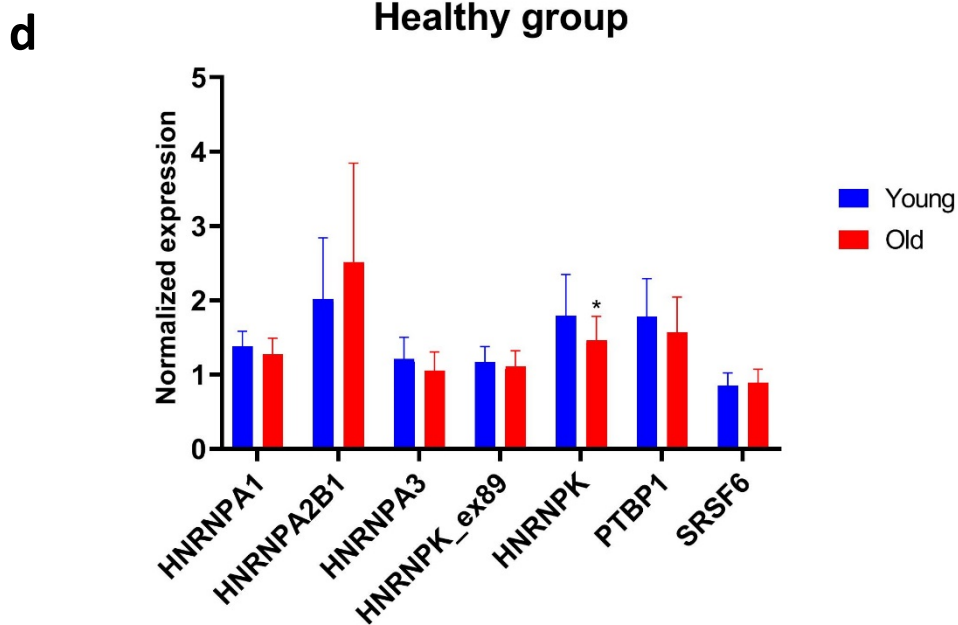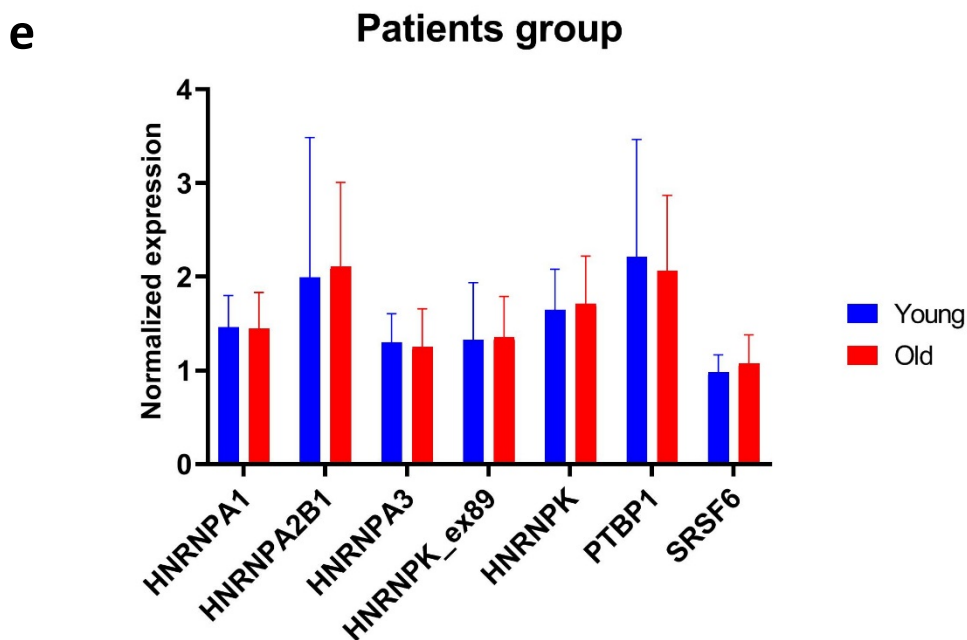

**Supplementary Figure S3: a-e.** RNA was extracted from cell-free saliva of 36 healthy and 31 breast cancer patients. Real-time PCR was conducted for HNRNPA1, HNRNPA2B1, HNRNPA3, HNRNPK, HNRNPK exon 8 inclusion, PTBP1 and SRSF6 and normalized to PPIA. Relative expression levels for each transcript were plotted (a). The data from 36 healthy subjects were pooled together and divided based on age to “young” and “old” groups. Relative expression levels were summed and plotted (b). The data from 31 breast cancer patients were pooled together and divided based on age to “young” and “old” groups. Relative expression levels were summed and plotted (c). The data from 36 healthy subjects were pooled together and divided based on age to “young” and “old” groups. Relative expression levels were summed and plotted for each splicing factor (d). The data from 31 breast cancer patients were pooled together and divided based on age to “young” and “old” groups. Relative expression levels were summed and plotted for each splicing factor (e).

Supplementary Table S1

| <b>Oligo name</b> | <b>Sequence</b>        |
|-------------------|------------------------|
| R_PPIA            | CTGCTGTCTTTGGGACCTTGT  |
| F_PPIA            | GTCAACCCACCGTGTTCTT    |
| F-SRSF6-exon2     | CCACGCACAAGCCATAGGCGAT |
| R-SRSF6-exon3     | CGACCTGGAACGGGAGCGACT  |
| f-HNRNPA1_total   | GCTCACGGACTGTGTGGTAA   |
| r-HNRNPA1_total   | GGCCTTGCATTCATAGCTGC   |
| f-HNRNPA2B1_total | CAGTTCTCACTACAGCGCCA   |
| r-HNRNPA2B1_total | TTTCTCTCCATCGCGGAC     |
| f-HNRNPA3_total   | TGAAAGGGGGCAGTTTTGGT   |
| r-HNRNPA3_total   | ACTGTAGCCCTTTTCTGCTGT  |
| f-HNRNPK_ex8-9    | AATCTGATGCTGTGGAATGC   |
| r-HNRNPK_ex8-9    | ATTCCTCCTGCTAGACTCTG   |
| f-HNRNPK_total    | ACGCCCTGCAGAAGATATGG   |
| r-HNRNPK_total    | CCCAGCATTCTTGCTCTGA    |
| f-PTBP1_total     | AGGGGAAAAACCAGGCCTTC   |
| r-PTBP1_total     | GGAGAGCTGTCGGTCTTCAG   |

Supplementary Table S2

|           |
|-----------|
| CELF1     |
| RBFOX2    |
| HNRNPA1   |
| HNRNPA2B1 |
| HNRNPA3   |
| HNRNPC    |
| HNRNPD    |
| HNRNPDL   |
| HNRNPF    |
| RBMX      |
| HNRNPH1   |
| PTBP1     |
| HNRNPK    |
| HNRNPL    |
| HNRNPM    |
| FUS       |
| SYNCRIP   |
| HNRNPU    |
| KHSRP     |
| MBNL1     |
| SFPQ      |
| KHDRBS1   |
| SF3B1     |
| SF1       |
| SRSF1     |
| SRSF3     |
| SRSF6     |
| YBX1      |
